# Supplementary material for: Pleiotropic constraints promote the evolution of cooperation in cellular groups
Source: PLoS Biol. 2022 Jun 3;20(6):e3001626. doi: 10.1371/journal.pbio.3001626 (PMC9166655; doi:10.1371/journal.pbio.3001626)
Supplement: S6 Fig — Within-group mutation selection dynamics are shown for a group founded by a cell with genotype g2, which actively expresses pleiotropy, zpc=1, but no cooperation, zuc=0, a no private trait, zvc=0. Growth of the group as its age, y, increases, is logistic, with a carrying capacity K = 200. Dynamics are shown from left to right for 3 different strengths of pleiotropy, ϕ. The vertical dashed line in (A-C) represents the point at which mutant cell lineages make up 25% of the group. Note that the strength of pleiotropy has no effect on the within-group dynamics. (A) Changes in genotype abundances, nc(y). (B) Changes in genotype relative frequencies, xc(y). (C) Changes in the average levels of cooperation, private trait expression, and pleiotropy, z¯c(y). (D) Differential fitness effects of loss-of-function mutations within the group. Parameters: sc = 0.95; K = 200; μ = 0.0001; ν = 0.01. The code required to generate this figure can be found at https://github.com/euler-mab/pleiotropy and https://zenodo.org/record/6367788#.YjSBVurP2Uk. (DOCX) [file pbio.3001626.s007.docx]

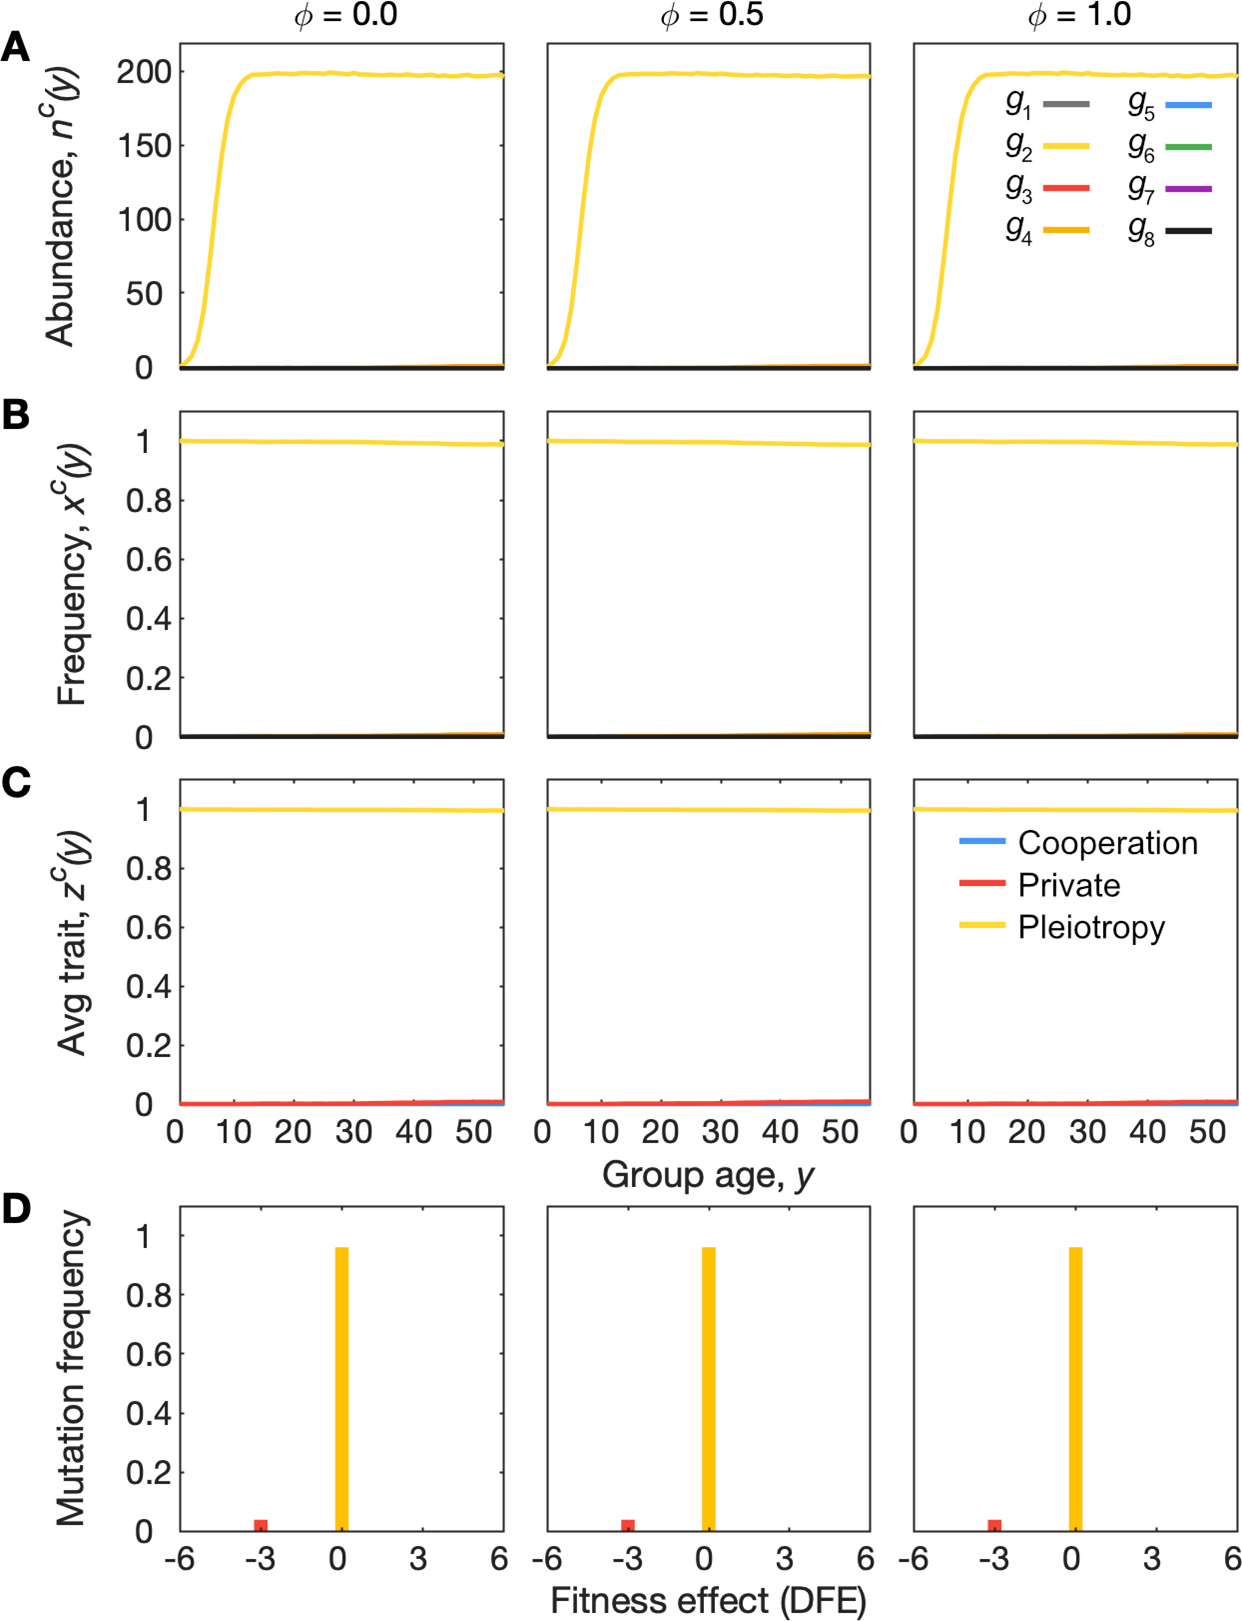


**S6 Fig. Within-group evolutionary dynamics of groups founded by cells with genotype 2.** Within-group mutation selection dynamics are shown for a group founded by a cell with genotype , which actively expresses pleiotropy, , but no cooperation, , a no private trait, . Growth of the group as its age, , increases, is logistic, with a carrying capacity . Dynamics are shown from left to right for three different strengths of pleiotropy, . The vertical dashed line in (A-C) represents the point at which mutant cell lineages make up 25% of the group. Note that the strength of pleiotropy has no effect on the within-group dynamics. (A) Changes in genotype abundances, . (B) Changes in genotype relative frequencies, . (C) Changes in the average levels of cooperation, private trait expression, and pleiotropy, . (D) Differential fitness effects of loss-of-function mutations within the group. Parameters: ; ; ; . The code required to generate this Figure can be found at https://github.com/euler-mab/pleiotropy and https://zenodo.org/record/6367788#.YjSBVurP2Uk.
