# Supplementary material for: Pleiotropic constraints promote the evolution of cooperation in cellular groups
Source: PLoS Biol. 2022 Jun 3;20(6):e3001626. doi: 10.1371/journal.pbio.3001626 (PMC9166655; doi:10.1371/journal.pbio.3001626)
Supplement: S14 Fig — We varied the relative rate of gain-of-function mutations to loss-of-function mutations, ν. Heatmaps show average trait values among the global population of cells (across all groups) at steady state in our model. Results are shown for 3 gain-of-function rates (increasing from top to bottom). The gain-of-function ratio had a marginal effect on the evolution of pleiotropy, favouring slightly higher rates when ν is higher. The dotted line marks the boundary between pleiotropy having no effect (control case) and pleiotropy having an effect on the outcome of mutations. Parameters: sc = sg = 0.95; K = 200; μ = 0.0001; K = 200. The code required to generate this figure can be found at https://github.com/euler-mab/pleiotropy and https://zenodo.org/record/6367788#.YjSBVurP2Uk. (DOCX) [file pbio.3001626.s015.docx]

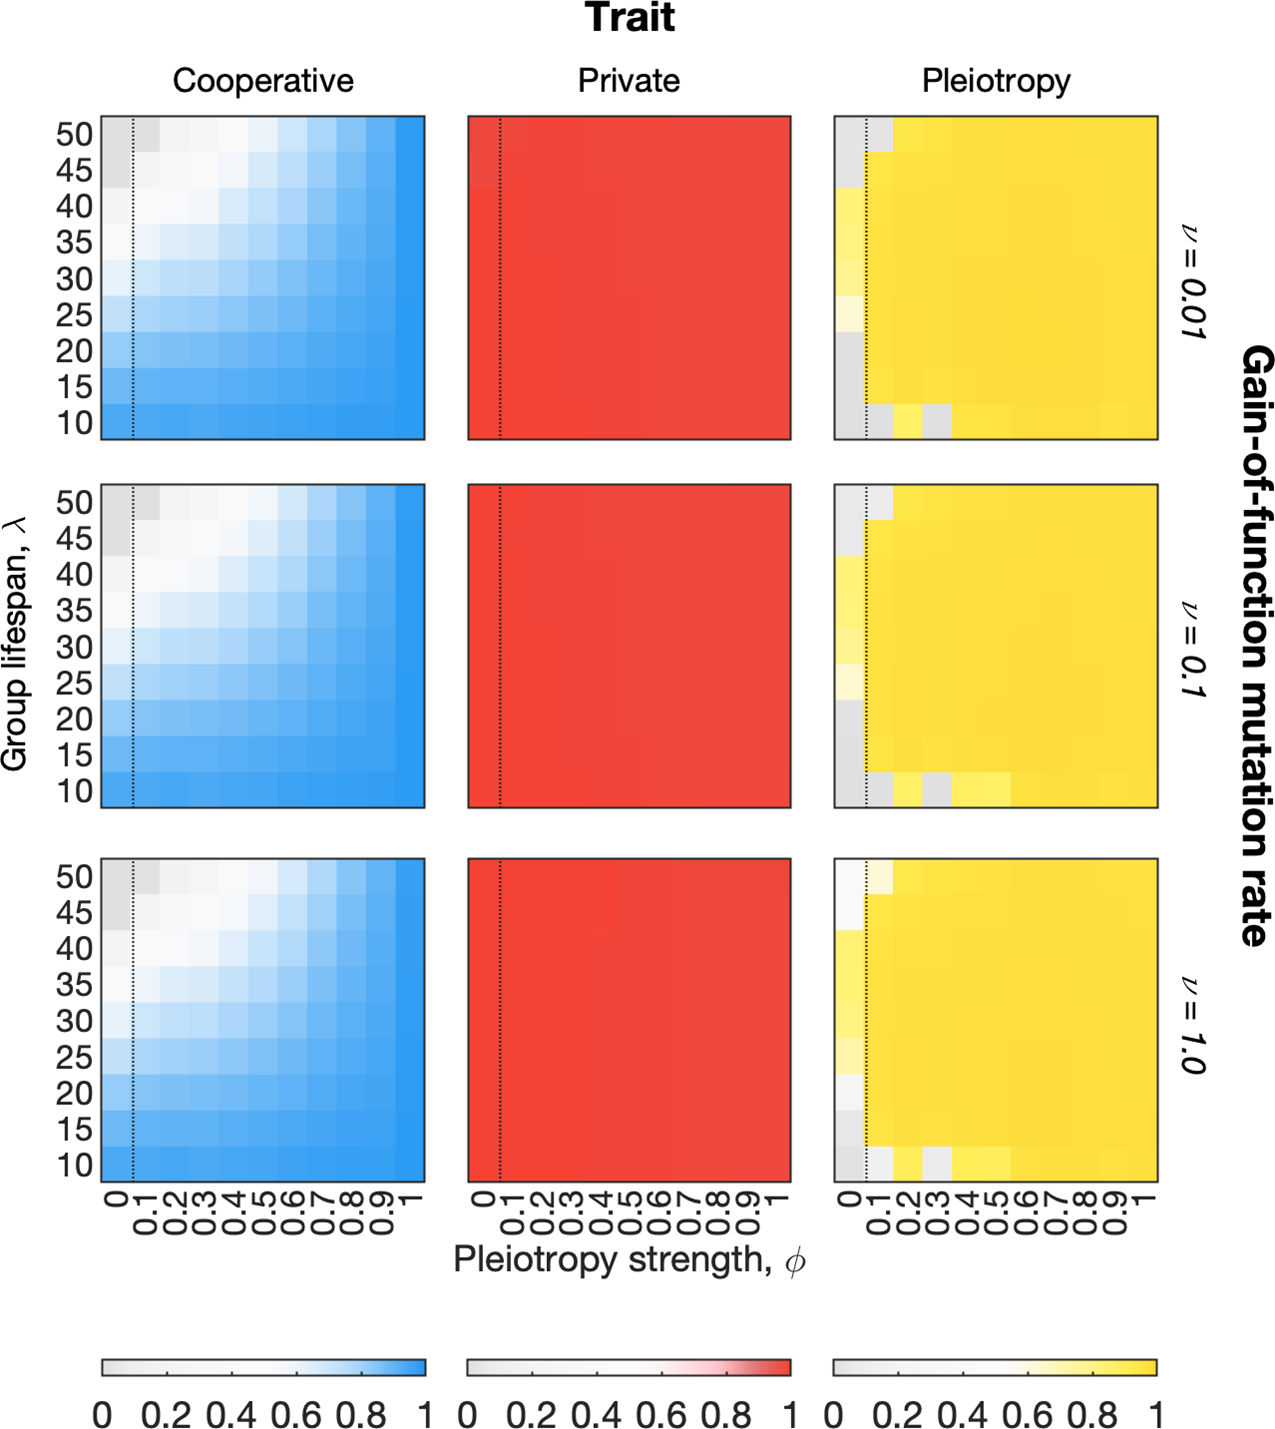


**S14 Fig. The rate of gain-of-function mutations has little impact on the dynamics of pleiotropy evolution.** We varied the relative rate of gain-of-function mutations to loss-of-function mutations, . Heatmaps show average trait values among the global population of cells (across all groups) at steady state in our model. Results are shown for three gain-of-function rates (increasing from top to bottom). The gain-of-function ratio had a marginal effect on the evolution of pleiotropy, favouring slightly higher rates when is higher. The dotted line marks the boundary between pleiotropy having no effect (control case) and pleiotropy having an effect on the outcome of mutations. Parameters: ; ; ; . The code required to generate this Figure can be found at https://github.com/euler-mab/pleiotropy and https://zenodo.org/record/6367788#.YjSBVurP2Uk.
